# Supplementary material for: First-principles investigation of the hydrogen evolution reaction on different surfaces of pyrites MnS2, FeS2, CoS2, NiS2
Source: Royal Society of Chemistry journal article supplement (doi:10.1039/c9cp03893k), 2019-01-01
Supplement: c9cp03893k1.pdf [file c9cp03893k1.pdf]

## Supporting information

# First-principles investigation of the hydrogen evolution reaction on different surfaces of $\text{MnS}_2$ , $\text{FeS}_2$ , $\text{CoS}_2$ , $\text{NiS}_2$

Ming-Hsiu Wu,<sup>†</sup> Wan-Jou Chou,<sup>†</sup> Jian-Syun Huang,<sup>†</sup> Darwin Barayang Putungan,<sup>\*,‡</sup> and Shi-Hsin Lin<sup>\*,†</sup>

<sup>†</sup>*Department of Materials Science and Optoelectronic Engineering, Center of Crystal Research, National Sun Yat-sen University, Kaohsiung 804, Taiwan*

<sup>‡</sup>*Physics Division, Institute of Mathematical Sciences and Physics, University of the Philippines Los Baños, College, Los Baños, Laguna 4031, Philippines*

E-mail: dbputungan@up.edu.ph; albert@mail.nsysu.edu.tw

## Density of states of different surfaces

We calculated the total density of states of four surface models of  $\text{MnS}_2$ ,  $\text{FeS}_2$ ,  $\text{CoS}_2$ ,  $\text{NiS}_2$  (see Fig. 1). It is shown that the gaps of electronic states of these four surfaces are zero. From the density of states of spin up and down, there are nonzero magnetization for  $\text{MnS}_2$ ,  $\text{FeS}_2$ , and  $\text{CoS}_2$  surfaces.

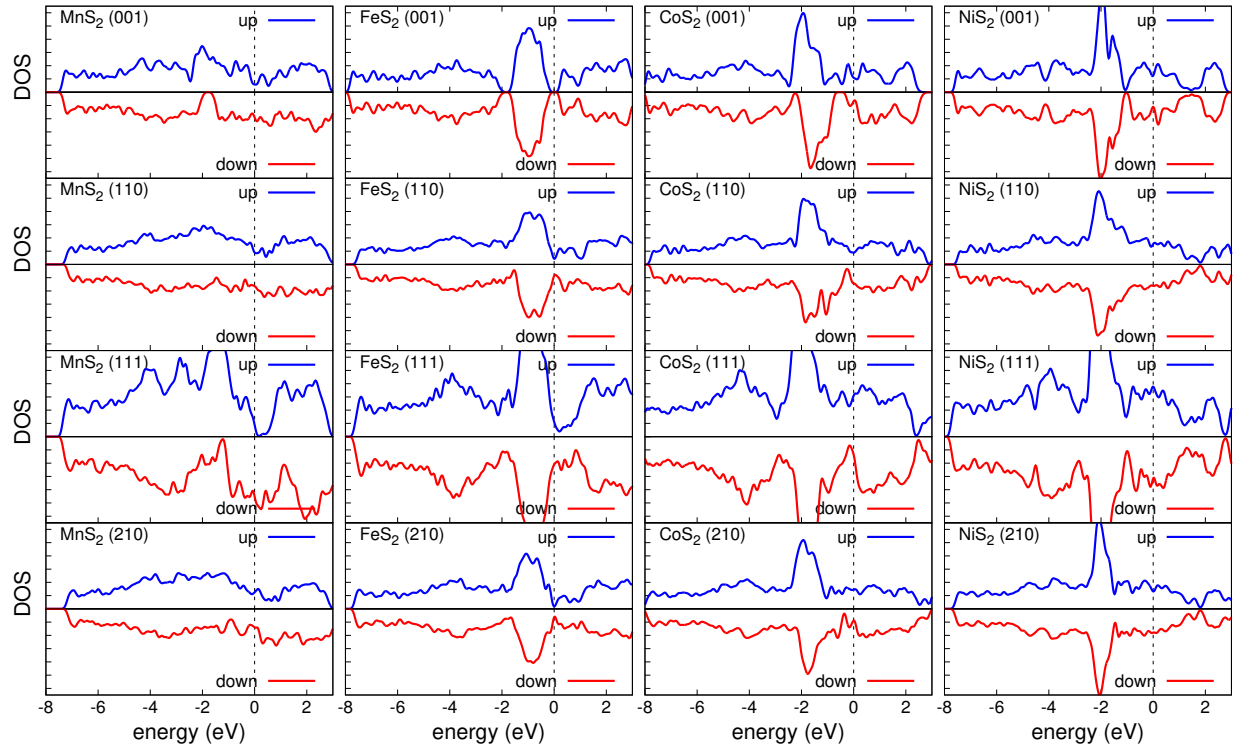

Figure 1: Total density of state of four surface models of  $\text{MnS}_2$ ,  $\text{FeS}_2$ ,  $\text{CoS}_2$ ,  $\text{NiS}_2$

### Trend of H adsorptions on the (110) surfaces of FeS<sub>2</sub>, CoS<sub>2</sub>, and NiS<sub>2</sub>

As discussed in the manuscript, H adsorptions on the (110) and (210) surfaces are gradually weakened from FeS<sub>2</sub>, to CoS<sub>2</sub>, and to NiS<sub>2</sub> (the  $\Delta G_{H^*} = -1.55, -0.19, 0.00$  eV for the (110) surfaces of FeS<sub>2</sub>, CoS<sub>2</sub>, and NiS<sub>2</sub>, and the  $\Delta G_{H^*} = -1.06, -0.19, -0.14$  eV for the (210) surfaces of FeS<sub>2</sub>, CoS<sub>2</sub>, and NiS<sub>2</sub> respectively. ). While the adsorption sites on (210) surfaces of FeS<sub>2</sub>, CoS<sub>2</sub>, and NiS<sub>2</sub> are different (transition metal sites for FeS<sub>2</sub> and CoS<sub>2</sub>, and S top site for NiS<sub>2</sub>), the adsorption sites on the (110) are all transition metal sites and their adsorption shows the wakened trend from iron to cobalt, and then nickle disulfides.

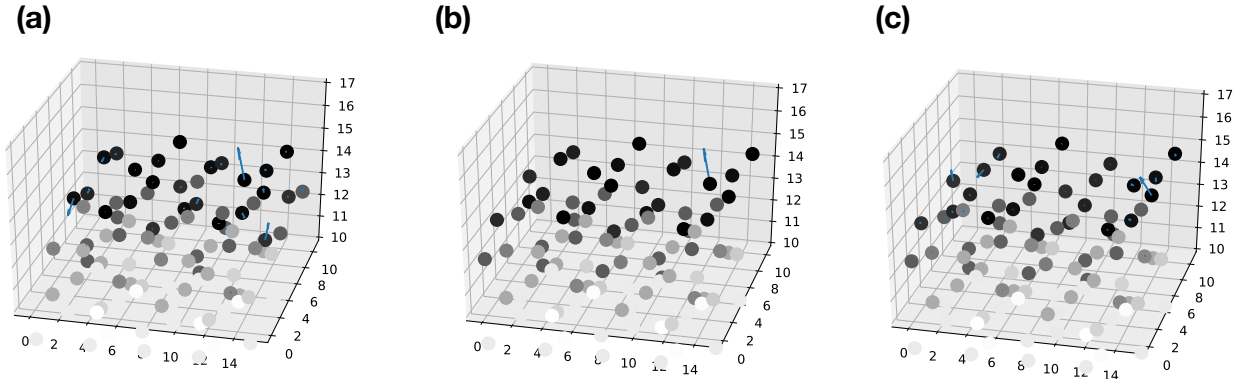

Figure 2: The displacements of atoms of (110) surface slab of (a) FeS<sub>2</sub>, (b) CoS<sub>2</sub>, and (c) NiS<sub>2</sub>. The displacement vectors are represented by the blue arrows, and the atoms by the solid balls.

From the density of states, Fe, Co, and Ni sulfides do not show very different hybridization strength with hydrogen. Besides the hybridization with the hydrogen, the surface reconstruction/relaxation also contributes to the free energy difference. We have analyzed the displacements of all atoms of the (110) surface slab model as the hydrogen is adsorbed (see Fig. 2). We used the norm of the all displacements  $\left(\sum_i^N |\vec{d}_i|^2\right)^{1/2}$ , where  $\vec{d}_i$  is the displacement of the  $i$ -th atom) as a measure of the surface structure modification, and it is 2.80 Å for FeS<sub>2</sub>, 2.35 Å for CoS<sub>2</sub>, and 1.67 Å for NiS<sub>2</sub>. Therefore, FeS<sub>2</sub> has the largest structure modification upon the hydrogen adsorption, followed by CoS<sub>2</sub>, then NiS<sub>2</sub>, which is consistent

with the order of free energy difference. The lattice constants of the considered pyrites are in the order:  $\text{FeS}_2 < \text{CoS}_2 < \text{NiS}_2$ , thus the hydrogen adsorption impact greater on the  $\text{FeS}_2$ , as the atoms has less space to relax.

### **The convergence test (the energy vs. the energy cutoff)**

We performed density functional theory calculations implemented in the Vienna ab-initio simulation package (VASP)<sup>1,2</sup> with generalized gradient approximation (GGA) in Perdew-Burke-Ernzerhof (PBE)<sup>3</sup> parameterization as the exchange correlation functional. The structures of models and the first Brillouin Zone are described in the manuscript. Plane wave cutoff energies 300 eV, 400 eV, 500 eV, 600 eV, and 700 eV were used to determine the cutoff adopted for our calculations thereafter. According to the result (see Fig. 3), We chose 300 eV as the reasonable cutoff energy for later calculations. The accuracy is within 0.35 meV/atom for bulk, 1.5 meV/atom for (001) surface slab, 1 meV/atom for (110) surface slab, 1 meV/atom for (111) surface slab, 1.1 meV/atom for (210) surface slab. This energy cutoff is consistent with the previous first-principles calculations of the hydrogen evolution reaction for the same pyrite structure  $\text{CoS}_2$ .<sup>4</sup>

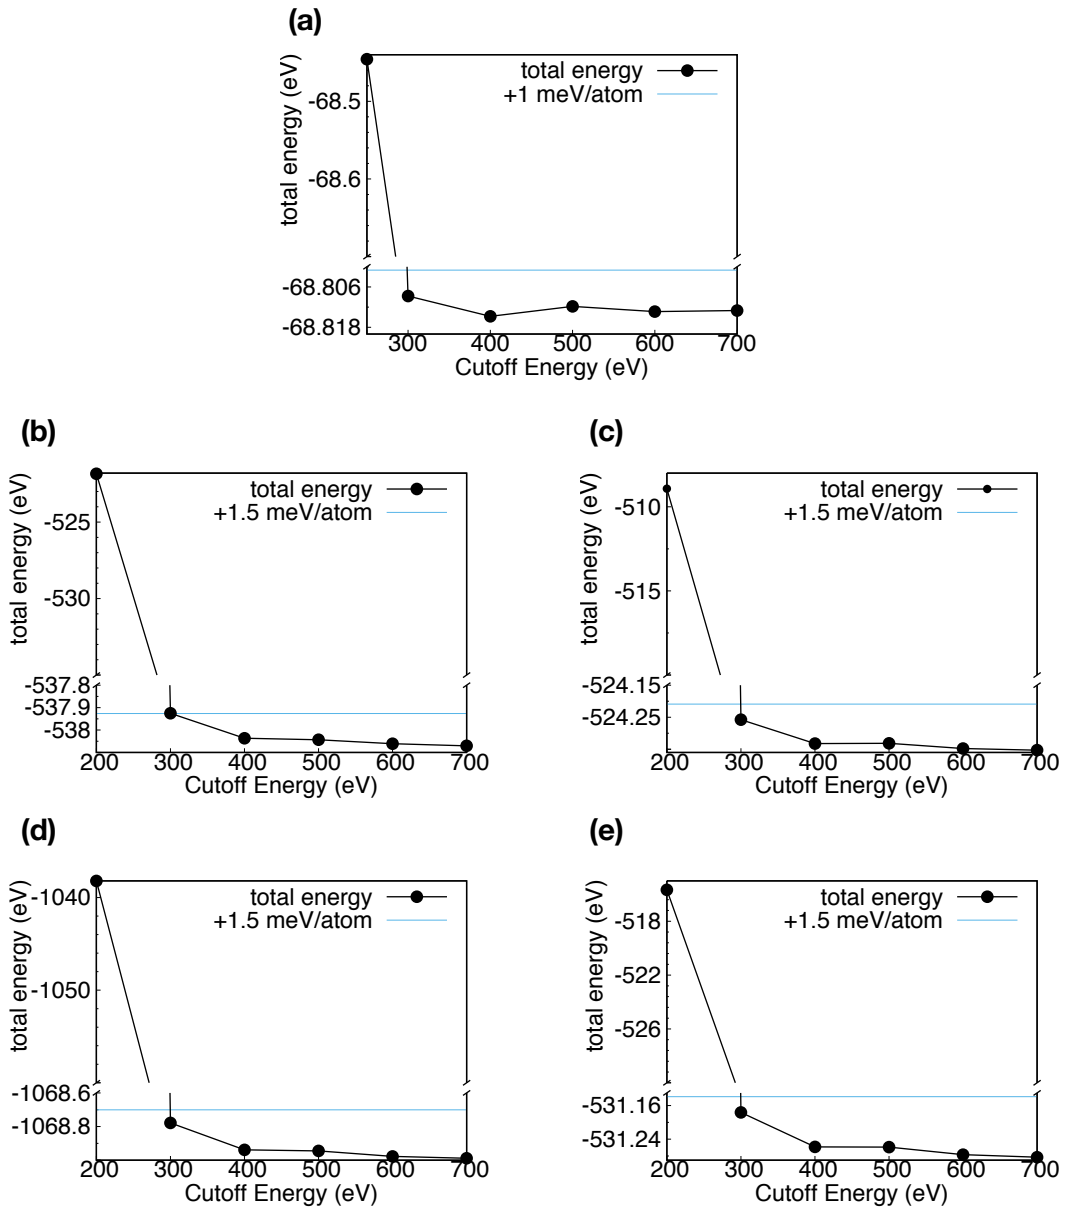

Figure 3: Bulk and four surface models of  $\text{CoS}_2$  energy cutoff convergence test (a) bulk (b) (001), (c) (110), (d) (111), and (e) (210).

## References

- (1) Kresse, G.; Furthmüller, J. Efficient iterative schemes for ab initio total-energy calculations using a plane-wave basis set. *Phys. Rev. B* **1996**, *54*, 11169–11186.
- (2) Kresse, G.; Hafner, J. Ab initio molecular dynamics for open-shell transition metals. *Phys. Rev. B* **1993**, *48*, 13115–13118.
- (3) Perdew, J. P.; Burke, K.; Ernzerhof, M. Generalized Gradient Approximation Made Simple. *Phys. Rev. Lett.* **1996**, *77*, 3865–3868.
- (4) Cabán-Acevedo, M.; Stone, M. L.; Schmidt, J. R.; Thomas, J. G.; Ding, Q.; Chang, H. C.; Tsai, M. L.; He, H.; Jin, S. Efficient hydrogen evolution catalysis using ternary pyrite-type cobalt phosphosulphide. *Nat. Mater.* **2015**, *14*, 1245–1251.
